# Supplementary material
Source: MDPI journal article supplement (https://www.mdpi.com/2071-1050/12/11/4692)
Supplement: s1 [file s1]

## Supplementary Materials

# Influence of land use/land cover on surface-water quality of Santa Lucía river, Uruguay

Angela Gorgoglione<sup>1,\*</sup>, Javier Gregorio<sup>1</sup>, Agustín Ríos<sup>1</sup>, Jimena Alonso<sup>1</sup>, Christian Chreties<sup>1</sup>, Mónica Fossati<sup>1</sup>

<sup>1</sup> Department of Fluid Mechanics and Environmental Engineering (IMFIA), School of Engineering, Universidad de la República, Julio Herrera y Reissig 565, Montevideo 11300, Uruguay.

\*Correspondence: agorgoglione@fing.edu.uy (A.G.)

### **Contents:**

**SM-1:** Primary land use (PLU) and secondary land use (SLU) in Santa Lucía Chico watershed.

**SM-2:** Shannon's diversity index (SHDI) calculation.

**SM-3:** Temporal variation of the annual averaged *TSI* values at the six monitoring stations.

**SM-4:** Statistical description of the normalized water-quality variables.

**SM-1:** Primary land use (PLU) and secondary land use (SLU) in Santa Lucía Chico watershed.

| <b>Primary land use (PLU)</b> | <b>Secondary land use (SLU)</b>                                                                                                                               |
|-------------------------------|---------------------------------------------------------------------------------------------------------------------------------------------------------------|
| Urbanization                  | Urban and semi-urban areas                                                                                                                                    |
| Mine                          | Quarries, sand pits, open-pit mines<br>Beaches, fixed and semi-fixed sand dunes                                                                               |
| Water bodies                  | Natural water bodies<br>Artificial water bodies<br>Reservoirs for irrigation                                                                                  |
| Wetlands                      | Wetland                                                                                                                                                       |
| Forest                        | Native forest<br>Forest plantation<br>New planted forest, harvest, regrowth                                                                                   |
| Grassland                     | Natural grassland<br>Regenerated grassland<br>Mix of natural field, pasture and old stubble                                                                   |
| Agriculture                   | Extensive cultivation in dairy farms<br>Extensive rainfed cultivation<br>Rainfed cultivation stubble<br>Extensive cultivation with pivot irrigation<br>Citrus |

**SM-2:** Shannon's diversity index (SHDI) calculation.

The SHDI parameter was calculated using the following equation (Eq. (3) reported in the main manuscript):

$$SHDI = - \sum_{i=1}^m (p_i \ln p_i)$$

We report here the calculation of SHDI for agricultural (AGR) land-use.

As shown in the table shown in SM-1, AGR includes five land patches and their areas are known as well. Therefore, the proportion of each land patch area accounting for the total area of the primary land use (AGR in the case) can be calculated ( $P_i$ ).  $\ln$  is the natural logarithm.  $m$  is the number of land patches within the primary land use (five for AGR).

**SM-3:** Temporal variation of the annual averaged *TSI* values at the six monitoring stations.

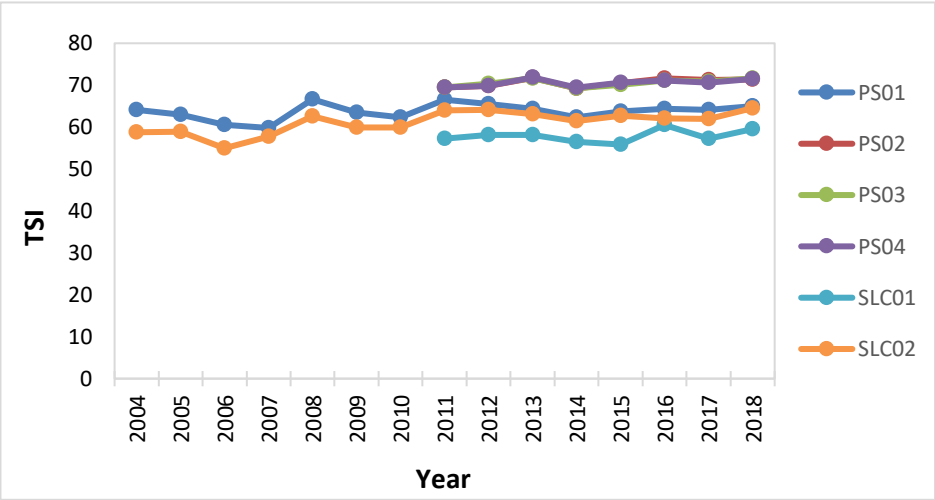

**SM-4:** Statistical description of the normalized water-quality variables.

|      | TP        | TN        | NO <sub>3</sub> <sup>-</sup> | NO <sub>2</sub> <sup>-</sup> | NH <sub>4</sub> <sup>+</sup> | Turbidity | T         | DO        | BOD <sub>5</sub> | Q         |
|------|-----------|-----------|------------------------------|------------------------------|------------------------------|-----------|-----------|-----------|------------------|-----------|
| mean | -1.08E-16 | 2.00E-16  | 6.32E-17                     | -2.40E-16                    | -9.35E-17                    | 3.98E-17  | 3.96E-17  | -1.73E-17 | -1.47E-17        | 1.95E-16  |
| std  | 1.00E+00  | 1.00E+00  | 1.00E+00                     | 1.00E+00                     | 1.00E+00                     | 1.00E+00  | 1.00E+00  | 1.00E+00  | 1.00E+00         | 1.00E+00  |
| min  | -2.24E+00 | -2.37E+00 | -2.29E+00                    | -1.06E+00                    | -8.96E-01                    | -1.46E+00 | -2.04E+00 | -6.20E-01 | -1.07E+00        | -4.02E-01 |
| 25%  | -6.34E-01 | -6.85E-01 | -7.01E-01                    | -7.54E-01                    | -6.62E-01                    | -7.69E-01 | -9.20E-01 | -2.46E-01 | -4.16E-01        | -3.85E-01 |
| 50%  | -1.65E-01 | -2.87E-02 | -1.20E-01                    | -1.66E-01                    | -4.03E-01                    | -2.06E-01 | 9.70E-02  | -1.51E-01 | -1.99E-01        | -3.44E-01 |
| 75%  | 5.71E-01  | 6.95E-01  | 5.41E-01                     | 2.76E-01                     | 2.16E-01                     | 4.24E-01  | 9.33E-01  | -6.71E-02 | 1.05E-01         | -1.89E-01 |
| max  | 5.78E+00  | 2.26E+00  | 4.28E+00                     | 4.90E+00                     | 4.88E+00                     | 4.11E+00  | 1.74E+00  | 7.42E+00  | 6.66E+00         | 5.30E+00  |
